# Supplementary material for: Advancements in Fermented Beverage Safety: Isolation and Application of Clavispora lusitaniae Cl-p for Ethyl Carbamate Degradation and Enhanced Flavor Profile
Source: MDPI journal article supplement (doi:10.3390/microorganisms12050882), 2024-04-28
Supplement: s1 [file s1]

**Table S1.** Changes of flavor substances in finished rice wine treated by Cl-p strain crude enzyme, immobilized crude enzyme and at 37 °C for 48 h.

| Compounds                      | Concentration (mg/L)       |                            |                            |                            |
|--------------------------------|----------------------------|----------------------------|----------------------------|----------------------------|
|                                | Control                    | I                          | II                         | III                        |
| Ethanol                        | 35.40 <sup>a</sup> ± 0.95  | 28.39 <sup>c</sup> ± 0.64  | 34.90 <sup>a</sup> ± 0.25  | 31.47 <sup>b</sup> ± 0.68  |
| 1-Propanol                     | 4.62 <sup>a</sup> ± 0.23   | 4.74 <sup>a</sup> ± 0.40   | 4.81 <sup>a</sup> ± 0.25   | 4.69 <sup>a</sup> ± 0.18   |
| 2-Methyl-1-propanol            | 16.75 <sup>a</sup> ± 0.71  | 13.94 <sup>b</sup> ± 0.13  | 15.99 <sup>a</sup> ± 0.07  | 14.42 <sup>b</sup> ± 0.07  |
| 3-Methyl-1-butanol             | 73.78 <sup>a</sup> ± 0.30  | 71.85 <sup>ab</sup> ± 0.29 | 72.14 <sup>b</sup> ± 1.00  | 72.99 <sup>ab</sup> ± 0.14 |
| 2,3-Butanediol                 | 3.30 <sup>a</sup> ± 0.19   | 3.12 <sup>a</sup> ± 0.03   | 3.11 <sup>a</sup> ± 0.04   | 3.15 <sup>a</sup> ± 0.02   |
| 1,2,3-Butanetriol              | 2.80 <sup>a</sup> ± 0.09   | 1.60 <sup>c</sup> ± 0.01   | 1.85 <sup>b</sup> ± 0.01   | 1.91 <sup>b</sup> ± 0.05   |
| Furfuryl alcohol               | 8.29 <sup>a</sup> ± 0.35   | 8.14 <sup>a</sup> ± 0.07   | 8.19 <sup>a</sup> ± 0.09   | 7.98 <sup>a</sup> ± 0.07   |
| n-heptanol                     | 1.17 <sup>a</sup> ± 0.17   | 0.90 <sup>a</sup> ± 0.01   | 1.08 <sup>a</sup> ± 0.01   | 1.06 <sup>a</sup> ± 0.09   |
| 1-Octanol                      | 2.65 <sup>a</sup> ± 0.12   | 2.81 <sup>a</sup> ± 0.11   | 2.47 <sup>b</sup> ± 0.13   | 2.54 <sup>a</sup> ± 0.04   |
| 1-nonanol                      | 1.69 <sup>a</sup> ± 0.23   | 1.80 <sup>a</sup> ± 0.01   | 1.80 <sup>a</sup> ± 0.02   | -                          |
| 2-Phenethyl alcohol            | 86.22 <sup>a</sup> ± 1.02  | 84.76 <sup>a</sup> ± 0.38  | 86.29 <sup>a</sup> ± 0.29  | 85.72 <sup>a</sup> ± 0.31  |
| 1-Octen-3-ol                   | 0.92 <sup>a</sup> ± 0.04   | 0.70 <sup>ab</sup> ± 0.01  | 0.48 <sup>b</sup> ± 0.04   | -                          |
| 1,2-Octanediol                 | 2.71 <sup>a</sup> ± 0.06   | 2.73 <sup>a</sup> ± 0.04   | 2.48 <sup>b</sup> ± 0.03   | 2.50 <sup>b</sup> ± 0.01   |
| Ethyl acetate                  | 24.43 <sup>a</sup> ± 0.79  | 22.50 <sup>b</sup> ± 0.18  | 23.77 <sup>a</sup> ± 0.18  | 19.06 <sup>c</sup> ± 0.10  |
| Propyl acetate                 | 0.27 <sup>a</sup> ± 0.04   | 0.26 <sup>a</sup> ± 0.02   | 0.22 <sup>a</sup> ± 0.01   | 0.24 <sup>a</sup> ± 0.01   |
| Isobutyl acetate               | 0.29 <sup>a</sup> ± 0.04   | 0.27 <sup>a</sup> ± 0.01   | 0.27 <sup>a</sup> ± 0.01   | 0.26 <sup>a</sup> ± 0.01   |
| Ethyl phenylacetate            | 5.40 <sup>a</sup> ± 0.38   | 4.89 <sup>a</sup> ± 0.03   | 4.93 <sup>a</sup> ± 0.03   | 4.97 <sup>a</sup> ± 0.09   |
| Ethyl lactate                  | 25.48 <sup>a</sup> ± 0.34  | 25.27 <sup>a</sup> ± 0.72  | 24.73 <sup>ab</sup> ± 0.08 | 23.06 <sup>c</sup> ± 0.41  |
| Ethyl butyrate                 | 27.70 <sup>a</sup> ± 0.20  | 25.04 <sup>c</sup> ± 0.07  | 26.82 <sup>d</sup> ± 0.23  | 25.86 <sup>b</sup> ± 0.13  |
| Ethyl isobutyrate              | 1.02 <sup>a</sup> ± 0.04   | 1.07 <sup>a</sup> ± 0.09   | 0.99 <sup>a</sup> ± 0.01   | 1.01 <sup>a</sup> ± 0.10   |
| Ethyl propionate               | 2.75 <sup>a</sup> ± 0.11   | 2.70 <sup>a</sup> ± 0.03   | 2.63 <sup>a</sup> ± 0.18   | 2.51 <sup>a</sup> ± 0.03   |
| Ethyl caproate                 | 3.38 <sup>a</sup> ± 0.06   | 2.90 <sup>b</sup> ± 0.01   | 3.03 <sup>b</sup> ± 0.07   | 3.08 <sup>b</sup> ± 0.07   |
| Ethyl valerate                 | 1.58 <sup>a</sup> ± 0.02   | 1.40 <sup>b</sup> ± 0.01   | 1.25 <sup>c</sup> ± 0.01   | 1.11 <sup>d</sup> ± 0.24   |
| Ethyl heptanoate               | 1.79 <sup>a</sup> ± 0.06   | 1.68 <sup>ab</sup> ± 0.03  | 1.58 <sup>bc</sup> ± 0.05  | 1.48 <sup>c</sup> ± 0.03   |
| Ethyl caprylate                | 1.21 <sup>a</sup> ± 0.19   | 1.01 <sup>a</sup> ± 0.04   | 1.07 <sup>a</sup> ± 0.02   | 1.14 <sup>a</sup> ± 0.08   |
| Isoamyl lactate                | 0.62 <sup>ab</sup> ± 0.08  | 0.69 <sup>a</sup> ± 0.04   | 0.50 <sup>b</sup> ± 0.01   | 0.59 <sup>ab</sup> ± 0.02  |
| Ethyl myristate                | 0.50 <sup>a</sup> ± 0.04   | 0.44 <sup>a</sup> ± 0.02   | 0.47 <sup>a</sup> ± 0.03   | 0.45 <sup>a</sup> ± 0.04   |
| Ethyl palmitate                | 1.15 <sup>a</sup> ± 0.12   | 1.14 <sup>a</sup> ± 0.01   | 1.01 <sup>a</sup> ± 0.04   | 1.07 <sup>a</sup> ± 0.01   |
| Octadecanoic acid,ethyl ester  | 0.82 <sup>a</sup> ± 0.09   | 0.82 <sup>a</sup> ± 0.10   | 0.32 <sup>b</sup> ± 0.01   | 0.37 <sup>b</sup> ± 0.03   |
| Vanillin lactoside             | 0.62 <sup>a</sup> ± 0.10   | 0.58 <sup>a</sup> ± 0.02   | 0.54 <sup>a</sup> ± 0.01   | 0.34 <sup>b</sup> ± 0.02   |
| Acetic acid                    | 10.37 <sup>a</sup> ± 0.42  | 8.89 <sup>b</sup> ± 0.03   | 9.84 <sup>a</sup> ± 0.13   | 9.96 <sup>a</sup> ± 0.02   |
| Hexanoic acid                  | 2.15 <sup>a</sup> ± 0.18   | 1.99 <sup>ab</sup> ± 0.01  | 1.65 <sup>b</sup> ± 0.01   | 1.79 <sup>ab</sup> ± 0.03  |
| Propionic acid                 | 0.77 <sup>a</sup> ± 0.03   | 0.49 <sup>bc</sup> ± 0.02  | 0.46 <sup>c</sup> ± 0.01   | 0.57 <sup>b</sup> ± 0.02   |
| Isobutyric acid                | 1.01 <sup>a</sup> ± 0.03   | 0.40 <sup>d</sup> ± 0.02   | 0.50 <sup>c</sup> ± 0.01   | 0.65 <sup>b</sup> ± 0.03   |
| Valeric acid                   | 14.30 <sup>a</sup> ± 0.44  | 13.84 <sup>ab</sup> ± 0.09 | 13.81 <sup>b</sup> ± 0.24  | 13.93 <sup>a</sup> ± 0.07  |
| Octanoic acid                  | 0.78 <sup>a</sup> ± 0.01   | 0.57 <sup>a</sup> ± 0.02   | 0.79 <sup>a</sup> ± 0.02   | -                          |
| Decanoic acid                  | 0.14 <sup>a</sup> ± 0.02   | 0.09 <sup>b</sup> ± 0.02   | 0.12 <sup>a</sup> ± 0.02   | 0.13 <sup>a</sup> ± 0.01   |
| Acetaldehyde                   | 5.86 <sup>a</sup> ± 0.10   | 5.53 <sup>b</sup> ± 0.07   | 5.51 <sup>b</sup> ± 0.04   | 5.63 <sup>ab</sup> ± 0.06  |
| Phenylacetaldehyde             | 11.15 <sup>a</sup> ± 0.39  | 8.87 <sup>b</sup> ± 0.04   | 7.93 <sup>c</sup> ± 0.06   | 10.98 <sup>a</sup> ± 0.15  |
| Benzaldehyde                   | 2.87 <sup>a</sup> ± 0.28   | 2.26 <sup>b</sup> ± 0.03   | 2.01 <sup>b</sup> ± 0.03   | 1.89 <sup>b</sup> ± 0.02   |
| Furfuraldehyde                 | 0.69 <sup>a</sup> ± 0.05   | 0.47 <sup>b</sup> ± 0.02   | 0.57 <sup>ab</sup> ± 0.03  | 0.65 <sup>a</sup> ± 0.01   |
| Nonyl aldehyde                 | 0.38 <sup>ab</sup> ± 0.02  | 0.37 <sup>ab</sup> ± 0.03  | 0.31 <sup>b</sup> ± 0.01   | 0.42 <sup>a</sup> ± 0.02   |
| Caprinaldehyde                 | 0.20 <sup>a</sup> ± 0.01   | -                          | 0.17 <sup>a</sup> ± 0.01   | -                          |
| 5-(Hydroxymethyl)-2-furaldehyd | 0.40 <sup>a</sup> ± 0.01   | 0.30 <sup>b</sup> ± 0.01   | 0.28 <sup>b</sup> ± 0.01   | 0.38 <sup>a</sup> ± 0.03   |
| 3-Octanone                     | 0.024 <sup>a</sup> ± 0.004 | -                          | -                          | 0.022 <sup>a</sup> ± 0.002 |
| 2-Nonanone                     | 0.015 <sup>a</sup> ± 0.002 | -                          | -                          | 0.009 <sup>b</sup> ± 0.001 |
| 4-Vinylphenol                  | 0.020 <sup>a</sup> ± 0.004 | -                          | -                          | -                          |
| 2,4-Di-tert-butylphenol        | 0.026 <sup>a</sup> ± 0.001 | 0.025 <sup>a</sup> ± 0.003 | 0.024 <sup>a</sup> ± 0.002 | 0.025 <sup>a</sup> ± 0.001 |

Different letters in the same column indicate a significant difference (<sup>a,b,c,d</sup>  $p < 0.05$ ). Significance only indicates the comparison of the same substance in different groups. "Control" indicates untreated, "-" indicates no detected. "I" indicates crude enzyme treatment; "II" indicates immobilized crude enzyme treatment; "III" indicates inactivated crude enzyme treatment.
